# Supplementary material for: A Qualitative Study on Dubai’s Inclusive Education Policy from School Leaders’ Perspectives
Source: MDPI journal article supplement (doi:10.3390/su16031252), 2024-02-01
Supplement: s1 [file s1]

Archive with 1 entries (1 files):
- sustainability-2800144-supplementary.pdf
