# Supplementary material for: A Qualitative Study on Dubai’s Inclusive Education Policy from School Leaders’ Perspectives
Source: MDPI journal article supplement (doi:10.3390/su16031252), 2024-02-01
Supplement: s1 [file s1 › sustainability-2800144-supplementary.pdf]

## **Appendix: Interview guide**

### **Section 1: Before interviews starting:**

- Can you confirm the name of your school, its location, and the curriculum that it follows?
- Can you tell me a little bit about the student population at your school, including the number of students, their age range, and any specific characteristics or needs that they might have?
- Is there anything else that you think would be helpful for me to know before we begin the interview?

### **Section 2: Participant and school description**

- Can you tell me a little bit about yourself and your role in the school?
- How long have you been working in education, and what experience do you have with inclusive education?

### **Section 3: questions interview**

- Can you describe your understanding of the Dubai Inclusive Education Policy and why it is important for schools?
- What strategies have you implemented to promote inclusive education in your school? Can you provide examples?
- How important is involving parents and students in the process of creating an inclusive school environment? Can you share any experiences or examples?
- What challenges have you faced in implementing the Dubai Inclusive Education Policy in your school? How have you addressed these challenges?
- what is the most significant challenge in implementing inclusive education in your school, and what steps can be taken to address it?
- Is there anything I have not asked you about the use and reporting of Dubai inclusive education policy that you would like to tell me about?
